# Supplementary material
Source: publisher figshare collection journal article supplement (https://acs.figshare.com/ndownloader/files/25490862)
Supplement: Supplementary file [file 25490862]

3-D Human Renal Tubular Organoids Generated from  
Urine-Derived Stem Cells for Nephrotoxicity Screening  
Haibin Guo<sup>¶</sup>, Nan Deng<sup>¶</sup>, Lei Dou, Huifen Ding, Tracy  
Criswell, Anthony Atala, Cristina M. Furdui and  
Yuanyuan Zhang

Number of pages: 9

Number of figures: 4

Number of tables: 1

## ASSOCIATED CONTENT

### Supporting Information.

#### Figure Legends

**Figure S1.** Optimization of 3D organoid size and cell viability. **a)** The size of the organoids increased with increased seeding density (from 1,000 to 8,000 cells) after 7 days of culture as viewed using phase-contrast microscopy (scale bar 100  $\mu\text{m}$ ); **b)** Paraffin sections of 3D organoids were stained with H&E for internal morphologic characterization. Tubular-like structure formation in organoids with 4,000 cells (arrows); **c)** Organoids were stained using Life Technologies LIVE/DEAD Cell Imaging Kit (live cells = green, dead cells = red) and imaged using an Olympus FV10i confocal microscope (bottom panels, I–IV). Scale bars represent 100  $\mu\text{m}$ ; **d)** Cell Viability of human USC 3D organoids at different numbers of initial seeding cells one after week culture, assessed by Live/Dead cell imaging kit **e)** Quantification of organoid size over time ( $n = 6$ ). Data presented as mean  $\pm$  SD. Significance:  $*p < 0.05$ .

**Figure S2.** Tubular structure formation within organoids composed of USCs two weeks after exposure to k-ECM. **a).** Paraffin sections of USC-derived organoids (arrows) stained by H&E (low and high magnification); **b).** Quantification of tubular structure formation in 3D culture ( $n = 6$ ). Data presented as mean  $\pm$  SD. Significance:  $*p < 0.05$ .

**Figure S3.** USCs exposed to k-ECM were differentiated into renal cells after 14 days in 3D culture. **a).** Confocal images of human USC derived organoids (scale bar, 100  $\mu\text{m}$ ). Induced USC (4,000 cells at  $p3$ ) expressed the renal tubular epithelial cell marker (AQP1) and podocyte markers (nephrin and synaptopodin, *i.e.* SYNPO); **b).** Quantification of cells that expressed renal cell markers in 3D culture ( $n = 6$ ). Data presented as mean  $\pm$  SD. Significance:  $*p < 0.05$ .

**Figure S4.** Cisplatin and acetone-induced cytotoxicity of induced-USC ( $p3$ ) organoids 3 days after treatment. **a).** USCs in 3D culture displayed semi-transparency around the edges of organoids as seen by phase contrast microscopy and cell structure was well retained as seen by H&E staining (left column) (scale bar, 50  $\mu\text{m}$ ). Organoids showed signs of apoptosis or necrosis when exposed to 1% acetone. About 2/3 of the cells displayed some degree of nuclear dissolution

(karyolysis) and/or nuclear fragmentation in H&E stained sections (middle column). Almost all cells in the 3D organoids appeared dark with loss of the semi-transparency seen in untreated organoids by phase contrast microscopy. Nuclei condensation or pyknosis indicated cell death or necrosis when exposed to cisplatin (200  $\mu\text{m}/\text{ml}$ ) (right column); **b).** KIM-1 and **c).** CYP2E1 expression following drug exposure to cisplatin and acetone for 3 days ( $n = 6$ ). Data in graphs presented as mean  $\pm$  SD.

## AUTHOR INFORMATION

### Corresponding Author

\*Phone: 1-336-713-1189 (office).

E-mail: yzhang@wakehealth.edu

ORCID

Yuanyuan Zhang: 0000-0002-0050-0051

### Author Contributions

YHaibin Guo, and Nan Deng contributed equally to this work.

### Notes

The authors declare no competing financial interest.

## ACKNOWLEDGMENT

The authors appreciate the financial support from the CKD Biomarkers Consortium Pilot and Feasibility Studies Program funded by the National Institute of Diabetes and Digestive and Kidney Diseases (NIDDK: U01 DK103225) and from National Institute of Allergy and Infectious Diseases (NIAID R21 AI157876).

## ABBREVIATIONS

ATN, Acute tubular necrosis; RTEC, Renal tubular epithelial cells; USC, human urine-derived stem cell; k-ECM, kidney extracellular matrix; SYNPO, synaptopodin; KIM-1, kidney injury markers molecule-1; KFSM, keratinocyte serum free medium; DPBS, Dulbecco phosphate-buffered saline; ddH<sub>2</sub>O, double-distilled water; PFA, paraformaldehyde; H&E staining, hematoxylin-eosin staining.
